# Supplementary material
Source: PubMed Central journal article supplement (PMC4001288)
Supplement: supp_ciu117_ciu117supp.pdf [file supp_ciu117_ciu117supp.pdf]

**Web-Table 1: Comparison of renal outcomes and mortality between patients starting ART with and without TDF using (A) MDRD and (B) Cockcroft-Gault formulas**

**A**

| Baseline eGFR decrease | Difference in eGFR (ml/min) |          |                       |          | Progression to renal dysfunction |    |                          |    | Mortality         |
|------------------------|-----------------------------|----------|-----------------------|----------|----------------------------------|----|--------------------------|----|-------------------|
|                        | At 6 months (95% CI)        | (95% CI) | At 12 months (95% CI) | (95% CI) | Severe (95% CI)                  | OR | Moderate/severe (95% CI) | OR | sHR (95% CI)      |
| <b>None</b>            | -23.1 (-39.8, -6.48)        |          | -12.3 (-15.1, -7.30)  |          | 3.05 (1.82, 5.12)                |    | 3.20 (2.59, 3.97)        |    | 1.23 (1.15, 1.60) |
| <b>Mild</b>            | 0.10 (-0.37, 0.57)          |          | -6.18 (-8.51, -4.17)  |          | 5.47 (1.25, 23.9)                |    | 2.44 (1.80, 3.30)        |    | 0.80 (0.67, 0.95) |
| <b>Moderate</b>        | 1.79 (0.29, 3.29)           |          | -0.83 (-13.1, 11.2)   |          | 1.25 (0.51, 3.06)                |    | N/A                      |    | 0.78 (0.58, 1.05) |
| <b>Severe</b>          | 1.79 (0.29, 3.29)           |          | 17.9 (7.62, 33.2)     |          | N/A                              |    | N/A                      |    | 0.93 (0.54, 1.60) |

**B**

| Baseline eGFR decrease | Difference in eGFR (ml/min) |          |                       |          | Progression to renal dysfunction |    |                          |    | Mortality         |
|------------------------|-----------------------------|----------|-----------------------|----------|----------------------------------|----|--------------------------|----|-------------------|
|                        | At 6 months (95% CI)        | (95% CI) | At 12 months (95% CI) | (95% CI) | Severe (95% CI)                  | OR | Moderate/severe (95% CI) | OR | sHR (95% CI)      |
| <b>None</b>            | -9.77 (-13.9, -5.61)        |          | -10.3 (-14.4, -6.33)  |          | 2.62 (1.42, 4.83)                |    | 3.27 (2.68, 3.99)        |    | 1.15 (1.04, 1.27) |
| <b>Mild</b>            | -4.44 (-15.5, 6.57)         |          | -5.68 (-7.28, -4.07)  |          | 2.59 (1.14, 5.87)                |    | 2.58 (2.23, 2.99)        |    | 0.89 (0.79, 1.01) |
| <b>Moderate</b>        | -6.79 (-9.62, -3.97)        |          | -0.61 (-14.1, 12.9)   |          | 1.39 (0.76, 2.52)                |    | N/A                      |    | 0.83 (0.71, 0.97) |
| <b>Severe</b>          | 4.72 (-16.4, 25.8)          |          | 19.2 (6.23, 32.2)     |          | N/A                              |    | N/A                      |    | 1.03 (0.68, 1.58) |

TDF: tenofovir; eGFR: estimated glomerular filtration rate; sHR: sub-hazard ration; 95% CI: 95% confidence interval

**Web-Table 2: Comparison of renal outcomes and mortality between patients starting ART with and without TDF using CKD EPI after exclusion of patients on an ABC-containing regimen (Reference group: patients not on TDF)**

| Baseline eGFR decrease | Difference in eGFR (ml/min) |          |                       |          | Progression to renal dysfunction |    |                          |    | Mortality         |
|------------------------|-----------------------------|----------|-----------------------|----------|----------------------------------|----|--------------------------|----|-------------------|
|                        | At 6 months (95% CI)        | (95% CI) | At 12 months (95% CI) | (95% CI) | Severe (95% CI)                  | OR | Moderate/severe (95% CI) | OR | sHR (95% CI)      |
| <b>None</b>            | -9.06 (-9.83, -8.28)        |          | -10.2 (-11.0, -9.42)  |          | 3.17 (1.87, 5.36)                |    | 3.25 (2.61, 4.05)        |    | 1.21 (1.13, 1.30) |
| <b>Mild</b>            | -4.80 (-6.82, -2.77)        |          | -7.38 (-9.71, -5.05)  |          | 9.30 (1.20, 72.22)               |    | 2.67 (1.92, 3.70)        |    | 0.87 (0.71, 1.07) |
| <b>Moderate</b>        | -8.74 (-14.4, -3.08)        |          | -4.05 (-10.2, 2.11)   |          | 1.11 (0.42, 2.93)                |    | N/A                      |    | 0.74 (0.53, 1.03) |
| <b>Severe</b>          | 18.9 (-0.62, 38.39)         |          | 20.7 (2.22, 39.26)    |          | N/A                              |    | N/A                      |    | 0.74 (0.41, 1.33) |

ABC: Abacavir; TDF: tenofovir; eGFR: estimated glomerular filtration rate; sHR: sub-hazard ration; 95% CI: 95% confidence interval
